# Supplementary material for: Decline of COPD exacerbations in clinical trials over two decades – a systematic review and meta-regression
Source: PubMed Central journal article supplement (PMC6697937; doi:10.1186/s12931-019-1163-2), 2019-08-16
Supplement: 12931_2019_1163_MOESM1_ESM.pdf [file 12931_2019_1163_MOESM1_ESM.pdf]

**Table A1:** List of references ordered by publication year, and alphabetically within each year. Publication numbers shown in the left columns allow to identify the publications in the corresponding panel of Figure 2 (indicated by the tick marks at the top of each plot).

| index |      |     | study                                                                                                                                                                                                                                                      |
|-------|------|-----|------------------------------------------------------------------------------------------------------------------------------------------------------------------------------------------------------------------------------------------------------------|
| all   | true | ics |                                                                                                                                                                                                                                                            |
| 1     |      | 1   | Boyd et al. (1997). An evaluation of salmeterol in the treatment of chronic obstructive pulmonary disease (COPD). <i>European Respiratory Journal</i> ; 10(4):815-821.                                                                                     |
| 2     | 1    |     | Collet et al. (1997). Effects of an immunostimulating agent on acute exacerbations and hospitalizations in patients with chronic obstructive pulmonary disease. <i>American Journal of Respiratory and Critical Care Medicine</i> ; 156(6):1719-1724.      |
| 3     |      | 2   | Mahler et al. (1999). Efficacy of salmeterol xinafoate in the treatment of COPD. <i>Chest</i> ; 115(4):957-965.                                                                                                                                            |
| 4     | 2    |     | Burge et al. (2000). Randomised, double blind, placebo controlled study of fluticasone propionate in patients with moderate to severe chronic obstructive pulmonary disease: the ISOLDE trial. <i>BMJ</i> ; 320(7245):1279-1303.                           |
| 5     |      | 3   | Chapman et al. (2002). The addition of salmeterol 50µg bid to anticholinergic treatment in patients with {COPD}: a randomized, placebo controlled trial. <i>Canadian Respiratory Journal</i> ; 9(3):178-185.                                               |
| 6     |      | 4   | Donohue et al. (2002). A 6-month, placebo-controlled study comparing lung function and health status changes in COPD patients treated with Tiotropium or Salmeterol. <i>Chest</i> ; 122(1):47-55.                                                          |
| 7     |      | 5   | Rossi et al. (2002). Comparison of the efficacy, tolerability and safety of formoterol dry powder and oral, slow-release theophylline in the treatment of COPD. <i>Chest</i> ; 121(4):1058-1069.                                                           |
| 8     | 3    |     | Calverley et al. (2003a). Combined salmeterol and fluticasone in the treatment of chronic obstructive pulmonary disease: a randomized controlled trial. <i>The Lancet</i> ; 361(9356):449-456.                                                             |
| 9     | 4    |     | Calverley et al. (2003b). Maintenance therapy with budesonide and formoterol in chronic obstructive pulmonary disease. <i>European Respiratory Journal</i> ; 22(6):912-919.                                                                                |
| 10    | 5    |     | Celli et al. (2003). Symptoms are an important outcome in chronic obstructive pulmonary disease clinical trials: results of a 3-month comparative study using the Breathlessness, Cough and Sputum Scale (BCSS). <i>Respiratory Medicine</i> ; 97:S35-S43. |
| 11    |      | 6   | Hiller et al. (2003). Long-term use of Viozan (sibenaedet HCl) in patients with chronic obstructive pulmonary disease: results of a 1-year study. <i>Respiratory Medicine</i> ; 97:S45-S52.                                                                |
| 12    | 6    |     | Szafranski et al. (2003). Efficacy and safety of budesonide/formoterol in the management of chronic obstructive pulmonary disease. <i>European Respiratory Journal</i> ; 21(1):74-81.                                                                      |
| 13    |      | 7   | Campbell et al. (2005). Formoterol for maintenance and as-needed treatment of chronic obstructive pulmonary disease. <i>Respiratory Medicine</i> ; 99(12):1511-1520.                                                                                       |
| 14    | 7    |     | Rabe et al. (2005). Roflumilast - an oral anti-inflammatory treatment for chronic obstructive pulmonary disease: a randomized controlled trial. <i>The Lancet</i> ; 366(9485):563-571.                                                                     |
| 15    |      | 8   | Beeh et al. (2006). Wirksamkeit von Tiotropiumbromid (Spiriva) bei verschiedenen                                                                                                                                                                           |

|    |    |                                                                                                                                                                                                                                                                        |
|----|----|------------------------------------------------------------------------------------------------------------------------------------------------------------------------------------------------------------------------------------------------------------------------|
|    |    | Schweregraden der chronisch-obstruktiven Lungenerkrankung (COPD). <i>Pneumologie</i> ; 60(6):341-346.                                                                                                                                                                  |
| 16 | 9  | Dusser et al. (2006). The effect of tiotropium on exacerbations and airflow in patients with COPD. <i>European Respiratory Journal</i> ; 27(3):547-555.                                                                                                                |
| 17 | 8  | Paggiaro et al. (2006). Multicentre randomized placebo-controlled trial of inhaled fluticasone propionate in patients with chronic obstructive pulmonary disease. <i>The Lancet</i> ; 351(9195):773-780.                                                               |
| 18 | 9  | Rennard et al. (2006). Cilomilast for COPD: results of a 6-month, placebo-controlled study of a potent, selective inhibitor of phosphodiesterase 4. <i>Chest</i> ; 129(1):56-66.                                                                                       |
| 19 | 10 | Zhou et al. (2006). Positive benefits of theophylline in a randomized, double-blind, parallel-group, placebo-controlled study of low-dose, slow-release theophylline in the treatment of COPD for 1 year. <i>Respirology</i> ; 11(5):603-610.                          |
| 20 | 11 | Baumgartner et al. (2007). Nebulized arformeterol in patients with COPD: a 12-week, multicenter, randomized, double-blind, double-dummy, placebo- and active-controlled trial. <i>Clinical Therapeutics</i> ; 29(2):261-278.                                           |
| 21 | 10 | Calverley et al. (2007a). Effect of 1-year treatment with roflumilast in severe chronic obstructive pulmonary disease. <i>American Journal of Respiratory and Critical Care Medicine</i> ; 176(2):154-161.                                                             |
| 22 | 12 | Calverley et al. (2007b). Salmeterol and fluticasone propionate and survival in chronic obstructive pulmonary disease. <i>The New England Journal of Medicine</i> ; 356(8):775-789.                                                                                    |
| 23 | 11 | Zheng et al. (2007). The efficacy and safety of combination salmeterol (50 µg) / fluticasone propionate (500 µg) inhalation twice daily via accuhaler in Chinese patients with COPD. <i>Chest</i> ; 132(6):1756-1763.                                                  |
| 24 | 13 | Ambrosino et al. (2008). Tiotropium and exercise training in COPD patients: effects on dyspnea and exercise tolerance <i>International Journal of Chronic Obstructive Pulmonary Disease</i> ; 3(4):771-780.                                                            |
| 25 | 12 | Johansson et al. (2008). Bronchodilator efficacy of tiotropium in patients with mild to moderate COPD. <i>Primary Care Respiratory Journal</i> ; 17(3):169-175.                                                                                                        |
| 26 | 13 | Tashkin et al. (2008b). Efficacy and safety of budesonide and formoterol in one pressurized metered-dose inhaler in patients with moderate to very severe chronic obstructive pulmonary disease: Results of a 6-month clinical trial. <i>Drugs</i> ; 68(14):1975-2000. |
| 27 | 14 | Tonnel et al. (2008). Effect of tiotropium on health-related quality of life as a primary efficacy endpoint in COPD. <i>International Journal of Chronic Obstructive Pulmonary Disease</i> ; 3(2):301-310.                                                             |
| 28 | 15 | Dahl et al. (2010). Efficacy of a new once-daily long-acting inhaled beta-agonist indacaterol versus twice-daily formoterol in COPD. <i>Thorax</i> ; 65(6):473-479.                                                                                                    |
| 29 | 14 | Bogdan et al. (2011). Efficacy and safety of inhaled formoterol 4.5 and 9 µg twice daily in Japanese and European COPD patients: Phase III study results. <i>BMC Pulmonary Medicine</i> ; 11:51.                                                                       |
| 30 | 16 | Chapman et al. (2011). Long-term safety and efficacy of Indacaterol, a long-acting beta-agonist, in subjects with COPD. A randomized, placebo-controlled study. <i>Chest</i> ; 140(1):68-75.                                                                           |
| 31 | 17 | DUrzo et al. (2011) Efficacy and safety of once-daily NVA237 in patients with moderate-to-severe COPD: the GLOW1 trial. <i>Respiratory Medicine</i> ; 12:156.                                                                                                          |
| 32 | 18 | Jones et al. (2011a). Efficacy and safety of once-daily acclidinium in chronic obstructive pulmonary disease. <i>Respiratory Research</i> ; 12:55.                                                                                                                     |

|    |    |    |                                                                                                                                                                                                                                                                                                                                                                                                                                                                        |
|----|----|----|------------------------------------------------------------------------------------------------------------------------------------------------------------------------------------------------------------------------------------------------------------------------------------------------------------------------------------------------------------------------------------------------------------------------------------------------------------------------|
| 33 |    | 19 | Jones et al. (2011b). Efficacy and safety of once-daily aclidinium in chronic obstructive pulmonary disease. <i>Respiratory Research</i> ; 12:55.                                                                                                                                                                                                                                                                                                                      |
| 34 | 15 |    | Lee et al. (2011). Roflumilast in asian patients with COPD: A randomized placebo-controlled trial. <i>Respirology</i> ; 16(8):1249-1257.                                                                                                                                                                                                                                                                                                                               |
| 35 | 16 |    | Troosters et al. (2011). A 24 week, randomized, double-blind, placebo-controlled, multicenter study to evaluate the efficacy and safety of 18~mcg of tiotropium inhalation capsules administered by handihaler once-daily plus prn albuterol (salbutamol) vs. placebo plus prn albuterol (salbutamol) in chronic obstructive pulmonary disease subjects naive to maintenance therapy. <i>Clinical Study Report Synopsis, Boehringer-Ingelheim</i> , Protocol A4471008. |
| 36 | 17 |    | Doherty et al. (2012). Effects of mometasone furoate/formoterol fumarate fixed-dose combination formulation on chronic obstructive pulmonary disease (COPD): results from a 52-week Phase III trial in subjects with moderate-to-very severe COPD. <i>International Journal of COPD</i> ; 7:57-71.                                                                                                                                                                     |
| 37 |    | 20 | Jones et al. (2012). Efficacy and safety of twice-daily aclidinium bromide in COPD patients: the ATTAIN study. <i>European Respiratory Journal</i> ; 40(4):830-836.                                                                                                                                                                                                                                                                                                    |
| 38 |    | 21 | Kerwin et al. (2012). Efficacy and safety of NVA237 versus placebo and tiotropium in patients with COPD: the GLOW2 study. <i>European Respiratory Journal</i> ; 40(5):1106-1114.                                                                                                                                                                                                                                                                                       |
| 39 | 18 |    | Tashkin et al. (2012). Efficacy and safety characteristics of mometasone furoate/formoterol fumarate fixed-dose combination in subjects with moderate to very severe COPD: findings from pooled analysis of two randomized, 52-week placebo-controlled trials. <i>International Journal of COPD</i> ; 7:73-86.                                                                                                                                                         |
| 40 | 19 |    | Abrahams et al. (2013). Safety and efficacy of the once-daily anticholinergic BEA2180 compared with tiotropium in patients with COPD. <i>Respiratory Medicine</i> ; 107(6):854-862.                                                                                                                                                                                                                                                                                    |
| 41 |    | 22 | Bateman et al. (2013). Dual bronchodilation with QVA149 versus single bronchodilator therapy: the SHINE study. <i>European Respiratory Journal</i> ; 42(6):1484-1494.                                                                                                                                                                                                                                                                                                  |
| 42 |    | 23 | Donohue et al. (2013). Efficacy and safety of once-daily umeclidinium/vilanterol 62.5/25 mcg in COPD. <i>Respiratory Medicine</i> ; 107(10):1538-1546.                                                                                                                                                                                                                                                                                                                 |
| 43 |    | 24 | Rennard et al. (2013). ACCORD COPD II: A randomized clinical trial to evaluate the 12-week efficacy and safety of twice-daily aclidinium bromide in chronic obstructive pulmonary disease patients. <i>Clinical Drug Investigation</i> ; 33(12):893-904.                                                                                                                                                                                                               |
| 44 |    | 25 | Donohue et al. (2014b). Safety and tolerability of once-daily umeclidinium/vilanterol 125/25 mcg and umeclidinium 125 mcg in patients with chronic obstructive pulmonary disease: results from a 52-week, randomized, double-blind, placebo-controlled study. <i>Respiratory Research</i> ; 15:78.                                                                                                                                                                     |
| 45 |    | 26 | D'Urzo et al. (2014). Efficacy and safety of fixed-dose combinations of aclidinium bromide/formoterol fumarate: the 24-week, randomized, placebo-controlled AUGMENT COPD study. <i>Respiratory Research</i> ; 15:123.                                                                                                                                                                                                                                                  |
| 46 |    | 27 | Singh et al. (2014b). Efficacy and safety of aclidinium bromide/formoterol fumarate fixed-dose combinations compared with individual components and placebo in patients with COPD (ACLIFORM-COPD): a multicentre, randomised study. <i>BMC Pulmonary Medicine</i> ; 14:178.                                                                                                                                                                                            |
| 47 |    | 28 | Trivedi et al. (2014). Umeclidinium in patients with COPD: a randomised, placebo-controlled study. <i>European Respiratory Journal</i> ; 43(1):72-81.                                                                                                                                                                                                                                                                                                                  |
| 48 |    | 29 | Braido et al. (2015). Sub-lingual administration of a polyvalent mechanical bacterial lysate (PMBL) in patients with moderate, severe, or very severe chronic                                                                                                                                                                                                                                                                                                          |

|    |    |                                                                                                                                                                                                                                                                                                                |
|----|----|----------------------------------------------------------------------------------------------------------------------------------------------------------------------------------------------------------------------------------------------------------------------------------------------------------------|
|    |    | obstructive pulmonary disease (COPD) according to the GOLD spirometric classification: A multicentre, double-blind, randomised, controlled, phase IV study (AIACE study: Advanced Immunological Approach in COPD Exacerbation). <i>Pulmonary Pharmacology &amp; Therapeutics</i> ; 33:75-80.                   |
| 49 | 30 | Lee et al. (2015). Efficacy and safety of acclidinium bromide in patients with COPD: A phase 3 randomized clinical trial in a Korean population. <i>Respirology</i> ; 20(8):1222-1228.                                                                                                                         |
| 50 | 31 | Wang et al. (2015). Efficacy and safety of once-daily glycopyrronium in predominantly Chinese patients with moderate-to-severe chronic obstructive pulmonary disease: the GLOW7 study. <i>International Journal of COPD</i> ; 10:57-68.                                                                        |
| 51 | 20 | Zheng et al. (2015a). Efficacy and safety of fluticasone furoate/vilanterol (50/25 mcg; 100/25 mcg; 200/25 mcg) in Asian patients with chronic obstructive pulmonary disease: a randomized placebo-controlled trial. <i>Current Medical Research and Opinion</i> ; 31(6):1191-12000.                           |
| 52 | 32 | Zheng et al. (2015b). Efficacy and safety of once-daily inhaled umeclidinium/vilanterol in Asian patients with COPD: results from a randomized, placebo-controlled study. <i>International Journal of COPD</i> ; 10:1753-1767.                                                                                 |
| 53 | 21 | Bhatt et al. (2017). A randomized trial of once-daily fluticasone furoate/vilanterol or vilanterol versus placebo to determine effects on arterial stiffness in COPD. <i>International Journal of COPD</i> ; 12:351-365.                                                                                       |
| 54 | 33 | DUrzo et al. (2017). A randomised double-blind, placebo-controlled, long-term extension study of the efficacy, safety and tolerability of fixed-dose combinations of acclidinium/formoterol or monotherapy in the treatment of chronic obstructive pulmonary disease. <i>Respiratory Medicine</i> ; 125:39-48. |
| 55 | 34 | Maltais et al. (2018). Effect of 12 weeks of once-daily tiotropium/ olodaterol on exercise endurance during constant work-rate cycling and endurance shuttle walking in chronic obstructive pulmonary disease. <i>Therapeutic Advances in Respiratory Disease</i> ; 12:1-13.                                   |
